# Supplementary material for: Crystalline CO2-based polycarbonates prepared from racemic catalyst through intramolecularly interlocked assembly
Source: PubMed Central journal article supplement (PMC4634215; doi:10.1038/ncomms9594), 2015-10-15
Supplement: ncomms9594-s1.pdf [file ncomms9594-s1.pdf]

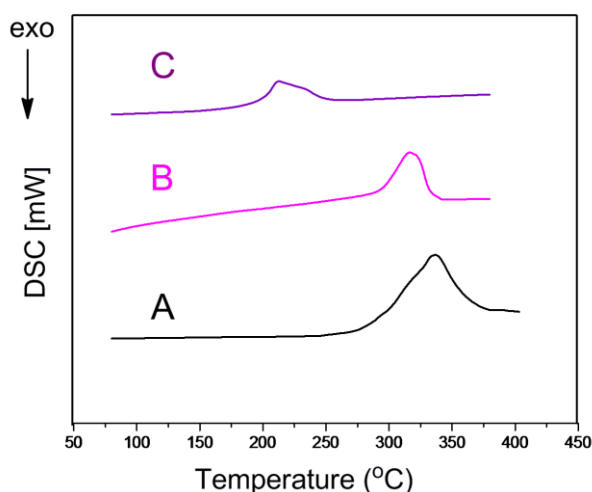

**Supplementary Figure 1 | FSC thermograms of various PCXCs.** A) PCXC prepared from *rac*-1/PPN-DNP catalyzed CXO/CO<sub>2</sub> copolymerization (Table 1, entry 1); B) PCXC prepared from *rac*-1/PPN-DNP catalyzed CXO/CO<sub>2</sub> copolymerization in presence of MeOH (*rac*-1/MeOH = 1/5, molar ratio) (Table 1, entry 2); C) PCXC prepared from *rac*-1/PPN-DNP catalyzed CXO/CO<sub>2</sub> copolymerization in presence of MeOH (*rac*-1/MeOH = 1/100, molar ratio) (Table 1, entry 4). The samples were crystallized isothermally at 180 °C for 2 h.

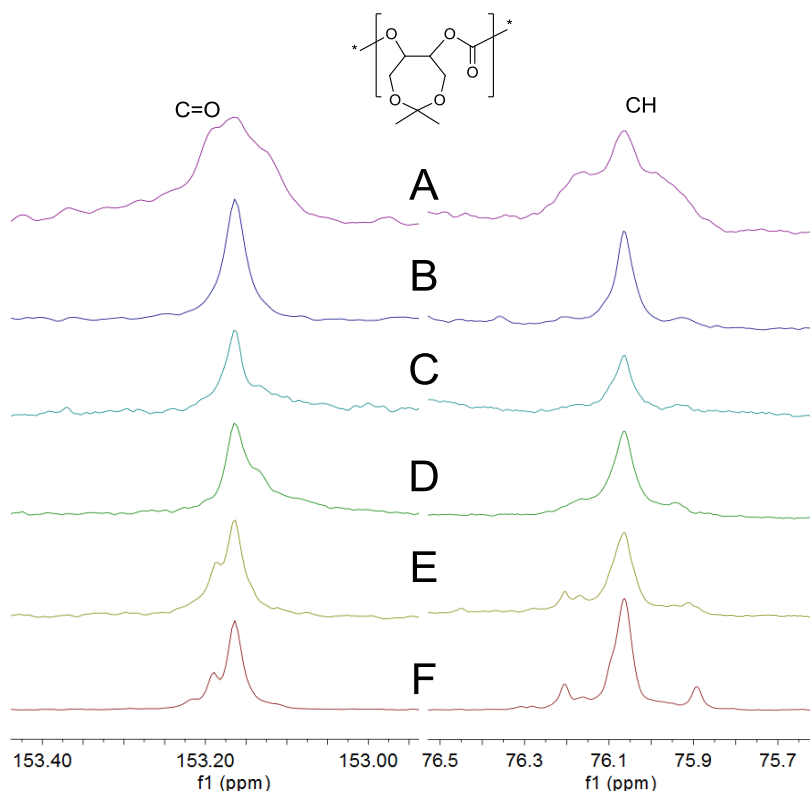

**Supplementary Figure 2 | The carbonyl (left) and methine (right) region of <sup>13</sup>C NMR spectra of various polycarbonates.** A) atactic PCXC; B) stereo-complexes result from (*R*)- and (*S*)-PCXCs with 1:1 mass ratio; (C) PCXC result from *rac*-1/PPN-DNP catalyzed CXO/CO<sub>2</sub> copolymerization; (D) PCXC result from *rac*-1/PPN-DNP catalyzed CXO/CO<sub>2</sub> copolymerization in presence of MeOH (*rac*-1/MeOH = 1/5, molar ratio); (E) PCXC result from *rac*-1/PPN-DNP catalyzed CXO/CO<sub>2</sub> copolymerization in presence of MeOH (*rac*-1/MeOH = 1/50, molar ratio); (F) PCXC result from *rac*-1/PPN-DNP catalyzed CXO/CO<sub>2</sub> copolymerization in presence of MeOH (*rac*-1/MeOH = 1/100, molar ratio).

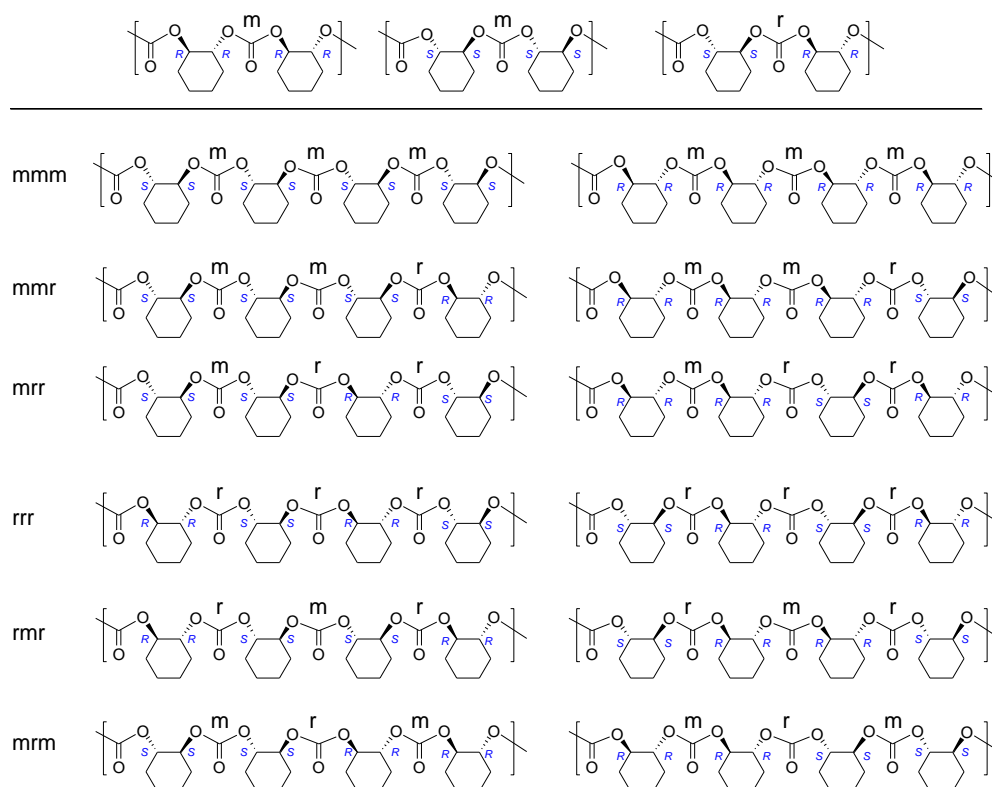

**Supplementary Figure 3 | Various microstructures of poly(cyclohexene carbonate).** The relationship between the tetrad sequences and the polymer microstructures.

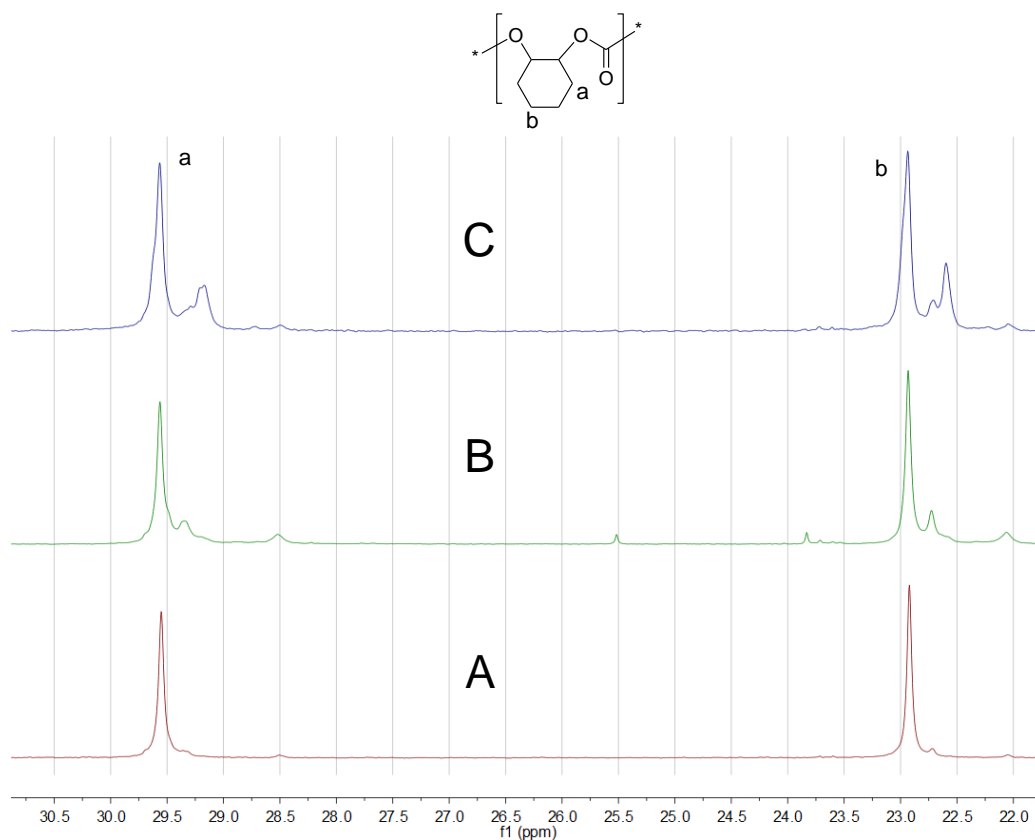

**Supplementary Figure 4 | Methylene region of the  $^{13}\text{C}$  NMR spectra (125 MHz,  $\text{CDCl}_3$ ) of various PCHCs.** A) PCHC with 0.96  $P_m$  catalyzed by enantiopure dinuclear Co(III) catalyst in toluene;<sup>1</sup> B) PCHC with 0.84  $P_m$  catalyzed by enantiopure dinuclear Co(III) catalyst;<sup>1</sup> C) PCHC with 0.82  $P_m$  catalyzed by catalyst *racemic-1* (Table 1, entry 7).

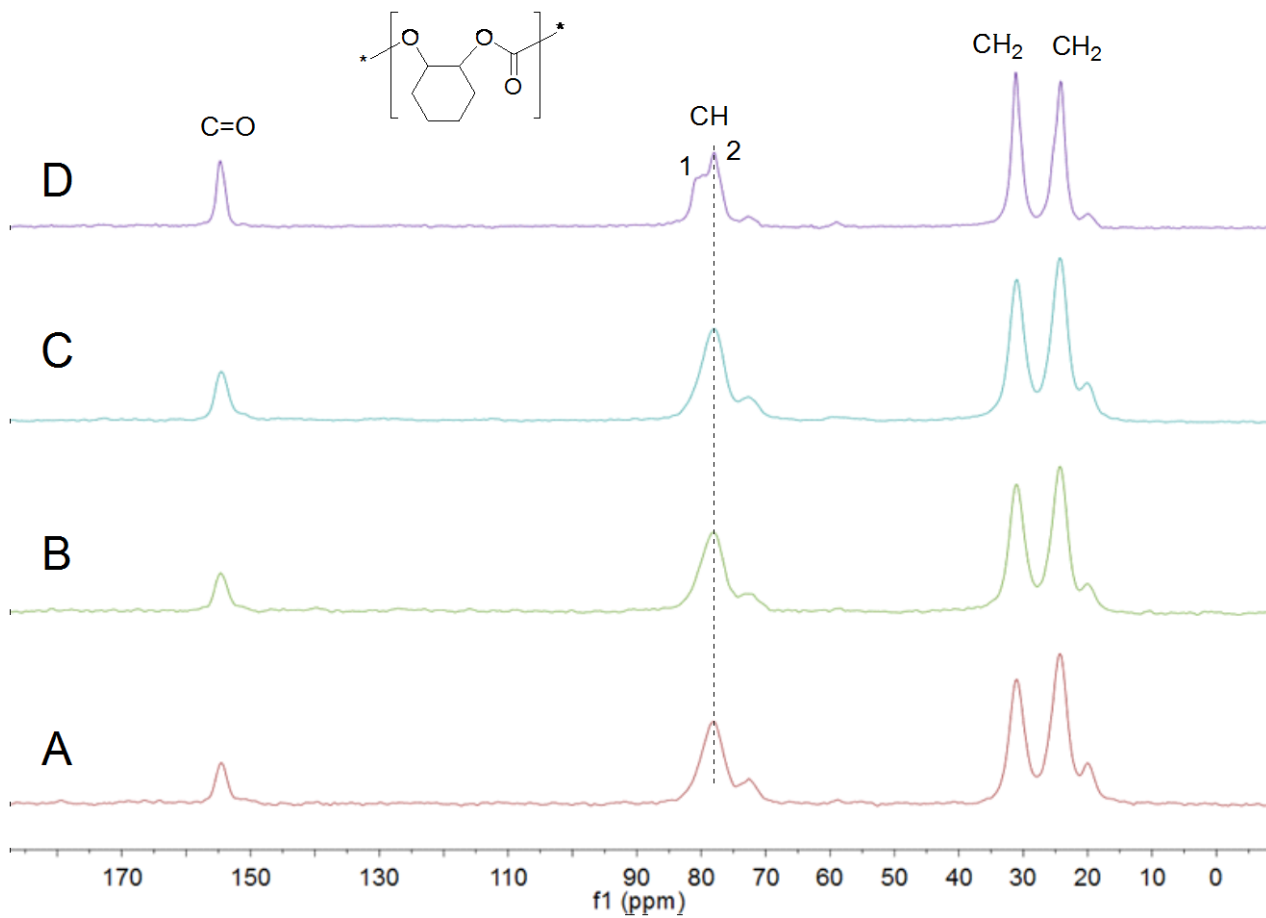

**Supplementary Figure 5** |  $^{13}\text{C}$  CPMAS NMR spectra of various PCHCs. A) amorphous-PCHC; B) (*S*)-enantiopure-PCHC with 0.84  $P_m$ ; C) Multiblock-PCHC; D) Stereocomplexed-PCHC.

**Supplementary Table 1 |  $^{13}\text{C}$   $T_1$  relaxation times for solid various PCHCs at ambient temperature<sup>a</sup>**

| Entry | Various PCXCs        | $T_1$ (s) |     |     |                 |                 |
|-------|----------------------|-----------|-----|-----|-----------------|-----------------|
|       |                      | C=O       | CH  |     | CH <sub>2</sub> | CH <sub>2</sub> |
|       |                      |           | 1   | 2   |                 |                 |
| 1     | Amorphous-PCHC       | 48        | --- | 35  | 23              | 21              |
| 2     | PCHC with 0.84 $P_m$ | 44        | --- | 32  | 22              | 20              |
| 3     | Multiblock-PCHC      | 56        | --- | 39  | 26              | 24              |
| 4     | Stereocomplexed-PCHC | 271       | 250 | 195 | 146             | 110             |

<sup>a</sup>Measured with CPMAS NMR using the saturation-recovery based sequence .

## Supplementary Methods.

**Procedures for the copolymerization of CO<sub>2</sub> with *meso*-epoxides:** In a predried 20 mL autoclave equipped with a magnetic stirrer, catalyst *rac*-**1** (0.030 mmol, 1 equiv), cocatalyst (0.030 mmol, 1 equiv) and *meso*-epoxide (30 mmol, 1000 equiv) were dissolved in toluene in an argon atmosphere. After CO<sub>2</sub> was introduced, the reaction mixture was stirred at a desired temperature for an appropriate time. Then CO<sub>2</sub> was released, a small amount of the resultant mixture was removed from the autoclave for <sup>1</sup>H NMR analysis to quantitatively give the selectivity of polycarbonate to cyclic carbonate, as well as carbonate linkages. The crude polymer was dissolved in a 10 mL CHCl<sub>3</sub>/MeOH (5/1, v/v) mixture with 0.5% HCl solution and precipitated from methanol. This process was repeated 3-5 times to completely remove the catalyst, and white polymer was obtained by vacuum drying.

**NMR experiments.** <sup>1</sup>H and <sup>13</sup>C NMR spectra were recorded on Varian INOVA-400 MHz type (<sup>1</sup>H, 400 MHz), and a Bruker Avance 500 MHz type (<sup>13</sup>C, 125 MHz) spectrometer, respectively. Their peak frequencies were referenced *versus* an internal standard (TMS) shifts at 0 ppm for <sup>1</sup>H NMR and against the solvent, chloroform-*d* at 77.0 ppm for <sup>13</sup>C NMR, respectively.

**Mass spectrometry.** A Micromass Q-ToF (Micromass, Wythenshawe, UK) mass spectrometer equipped with an orthogonal electrospray source (Z-spray) used for the cobalt complexes in positive ion mode (Capillary = 2000 V, Sample cone = 20 V).

**Gel permeation chromatography (GPC).** Molecular weights and molecular weight distributions of polymers were determined with a PL-GPC 220 high temperature chromatograph (Polymer Laboratories Ltd.) equipped with the HP 1100 series pump from Agilent Technologies. The GPC columns were eluted with tetrahydrofuran at 35 °C at 1.00 mL/min. The sample concentration was about 0.1%, and the injection volume was 100 μL. The curve was calibrated using monodisperse polystyrene standards covering the molecular weight range from 580 to 460000 Da.

**Differential scanning calorimetry (DSC)** was carried out with a NETZSCH DSC 206 thermal analyzer. First cycle: from 20 °C to 180 °C at a heating rate of 10 K/min, and from 180 to 20 °C at a cooling rate of 10 K/min. Second cycle: from 20 to 280 °C at a heating rate of 10 K/min. For all DSC analysis, the result was given based on second cycle.

**Wide angle X-ray diffraction (WAXD).** Powder X-ray diffraction data were collected on a EMPYREAN diffractometer with Cu KR radiation ( $\lambda = 1.54056 \text{ \AA}$ ) over the  $2\theta$  range of 5-80° with a scan speed of 0.128548/s and a step size of 0.0083556° at room temperature. The samples were

crystallized isothermally at designed temperature for 2 h and measured at room temperature in air atmosphere.

**Synthesis of catalyst.** The di-nuclear cobalt catalyst *racemic-1* were prepared according to the literature method.<sup>1</sup>

**Synthesis of cocatalyst.** The cocatalyst PPN-DNP (PPN =bis(triphenylphosphine)iminium, DNP = 2, 4-dinitrophenoxide)<sup>2</sup> and PPN-PF<sub>6</sub> (PPN =bis(triphenylphosphine)iminium, PF<sub>6</sub> = hexafluorophosphate)<sup>3</sup> were prepared according to the literature method.

### Supplementary References.

- 1 Liu, Y., Ren, W. M., Liu, J. & Lu, X. B. Asymmetric copolymerization of CO<sub>2</sub> with *meso*-epoxides mediated by dinuclear cobalt(III) complexes: unprecedented enantioselectivity and activity. *Angew. Chem. Int. Ed.* **52**, 11594–11598 (2013).
- 2 Wu, G. P., Wei, S. H., Lu, X. B., Ren, W. M. & Darensbourg, D. J. Highly selective synthesis of CO<sub>2</sub> copolymer from styrene oxide. *Macromolecules* **43**, 9202–9204 (2010).
- 3 Liu, Y. *et al.* Mechanistic understanding of dinuclear cobalt(III) complex mediated highly enantioselective copolymerization of *meso*-epoxides with CO<sub>2</sub>. *Macromolecules* **47**, 7775–7788 (2014).
